# Supplementary material for: An Intra-Cycle Optimal Control Framework for Ventricular Assist Devices Based on Atrioventricular Plane Displacement Modeling
Source: PubMed Central journal article supplement (PMC8671277; doi:10.1007/s10439-021-02848-2), 2021-09-21
Supplement: 10439_2021_2848_MOESM1_ESM.pdf [file 10439_2021_2848_MOESM1_ESM.pdf]

## Supplemental Material

### 1 Model parameter values

The resistance and inertance of the LVAD is captured by the parameters  $R_{LVAD}$  and  $L_{LVAD}$ . We use the values from [53] as shown in Table Table S1 and given by

$$L_{LVAD} = L_i + L_o + 0.02177,$$

$$R_{LVAD} = R_i + R_o + 0.1707.$$

We altered the model from [30] to the situation of left heart failure by increasing the left atrial and ventricular compliance, increasing the systemic resistance, decreasing the length of AVPD, increasing the cross-section of LA and LV in order to account for a dilated heart, and decreasing the contraction force  $F_C$ . The specific parameter values are defined in Table Table S1.

**Table S1** Default parameter values for the cardiovascular, circulatory system, and LVAD model.

| Parameter | Description                    | Value                          |
|-----------|--------------------------------|--------------------------------|
| $C_{LA}$  | Left atrial compliance         | 0.6 ml/mmHg                    |
| $C_{LV}$  | Left ventricular compliance    | 0.45 ml/mmHg                   |
| $C_A$     | Aortic compliance              | 0.08 ml/mmHg                   |
| $C_S$     | Systemic arterial compliance   | 1.2 ml/mmHg                    |
| $C_V$     | Venous compliance              | 50 ml/mmHg                     |
| $R_M$     | Mitral valve resistance        | 0.005 mmHg s/ml                |
| $R_{AoV}$ | Aortic valve resistance        | 0.005 mmHg s/ml                |
| $R_S$     | Systemic arterial resistance   | 1.1 mmHg s/ml                  |
| $R_C$     | Characteristic resistance      | 0.05 mmHg s/ml                 |
| $R_i$     | LVAD inlet resistance          | 0.0677 mmHg s/ml               |
| $R_o$     | LVAD outlet resistance         | 0.0677 mmHg s/ml               |
| $R_{AVP}$ | Damping of AVP                 | 300 mmHg cm s                  |
| $L_S$     | Arterial inertance             | 0.001 mmHg s <sup>2</sup> /ml  |
| $L_i$     | Inlet inertance of LVAD        | 0.0127 mmHg s <sup>2</sup> /ml |
| $L_o$     | Outlet inertance of LVAD       | 0.0127 mmHg s <sup>2</sup> /ml |
| $L_{AVP}$ | Inertia of AVP                 | 30 mmHg cm s <sup>2</sup>      |
| $\beta$   | Pump-to-pressure coefficient   | -9.9025e-7                     |
| $A_{LA}$  | Left atrial cross-section      | 25 cm <sup>2</sup>             |
| $A_{LV}$  | Left ventricular cross-section | 50 cm <sup>2</sup>             |
| $F_{AC}$  | Left atrial contraction force  | 1000 mmHg cm <sup>2</sup>      |
| $F_{VC}$  | LV contraction force           | 5000 mmHg cm <sup>2</sup>      |
| $k_{RAD}$ | Radial function coefficient    | 1.2                            |
| $S_D$     | Switching threshold for AVP    | 0.4 cm                         |

### 2 Optimization parameter values

The following lower and upper bounds for the variables of the optimization problems were applied.

$$\mathbf{p} = [R_{AVP}, C_{LV}, L_{AVP}, F_{VC}, F_{AC}, A_{LV}, A_{LA}, k_{RAD}, S_D]^T,$$

$$\mathbf{p}_{lb} = [100, 0.45, 15, 4500, 900, 30, 15, 0.5, 0.2]^T,$$

$$\mathbf{p}_{ub} = [600, 5, 60, 7000, 1500, 42, 25, 1.35, 0.6]^T,$$

$$\mathbf{x} = [P_{LA}, P_{LV}, P_A, P_S, P_V, Q_A, Q_{LVAD}, v, s]^T,$$

$$\mathbf{x}_{lb} = [0, 0, 40, 0, 0, -100, -60, -15, -1.2]^T,$$

$$\mathbf{x}_{ub} = [60, 150, 160, 160, 150, 1000, 300, 15, 1.2]^T,$$

$$\mathbf{u}_{lb} = 2000, \quad \mathbf{u}_{ub} = 16000.$$

We used as initial differential state value for the parameter estimation problem:

$$\mathbf{x}_0 = [8, 8, 90, 90, 8, 10, 0, 0, -0.2]^T.$$

Furthermore, the following parameters for constraints were applied:

$$\epsilon_{flow} = 10 \text{ ml/s}, \quad \epsilon_{back} = -40 \text{ ml/s}, \quad \epsilon_{CO} = 80 \text{ ml},$$

$$V_{CO} = 5000 \text{ ml}, \quad \epsilon_{sw} = 0.001, \quad \epsilon_{per} = 0.09,$$

$$\epsilon_{partial} = 0.01 \text{ ml}.$$

The minimum dwell times for the pwc pump speed levels were

$$D_1 = 0.1s, \quad D_2 = 0.1s, \quad D_3 = 0.1s.$$

We also enforced upper bounds  $\tau_{ub}$  on the seven phase durations to be

$$\tau_{ub} = [0.3, 0.2, 0.2, 0.2, 0.2, 0.3, 0.5]^T \text{ seconds.}$$

The objective parameters are

$$\rho_1 = 0.5, \quad \rho_2 = 0.000133J / (\text{mmHg ml}), \quad \rho_3 = 0.01J \text{ s/ml}.$$

We used the following IPOPT setting: 'tol': 1e-6, 'constr\_viol\_tol': 1e-6, 'compl\_inf\_tol': 1e-6, 'dual\_inf\_tol': 1e-6.
